# Supplementary material
Source: Research Square preprint supplement (doi:10.21203/rs.3.rs-9827393/v1)
Supplement: Supplementary file 1 [file b4a9f4826240cae646bc9f2a.pdf]

## Supplementary Materials

### Supplementary Tables

**Table S1. Empirical equations for estimating elastic modulus from SPT-N and CPT  $q_c$  values in sandy soils**

| Test Type                                          | Equation                                         | Unit | Reference                 |
|----------------------------------------------------|--------------------------------------------------|------|---------------------------|
| SPT                                                | $E = 5(N_1)_{60} * P_a$                          | kPa  | (Kulhawy and Mayne 1990a) |
|                                                    | $E = 383(N + 12)$                                | kPa  | (Webb, 1970)              |
|                                                    | $E_s^{4/3} = 4213N$                              | kPa  | (Chaplin 1963)            |
|                                                    | $E = 622(N_1)_{60}$                              | kPa  | (Sabatini et al. 2002)    |
|                                                    | $E = 450(N_{55} + 15)$                           | kPa  | (Bowles 1996)             |
|                                                    | $E_s = 1.5q_c, q_c > 2586 \text{ kPa}$           | kPa  | (Beer, 1965)              |
|                                                    | $E_s = 3q_c, q_c < 2586 \text{ kPa}$             |      |                           |
| CPT                                                | $E_s = 2q_c$                                     | kPa  | (Schmertmann 1970)        |
|                                                    | $E_s = 2.5q_c \text{ L/B} = 1 \text{ to } 2$     | kPa  | (Schmertmann et al. 1978) |
|                                                    | $E_s = 3.5q_c \text{ L/B} \geq 10$               |      |                           |
|                                                    | $E_s = \alpha q_c \alpha = 3 - 12$               | kPa  | (Thomas 1968)             |
|                                                    | $E_s = 2.5(q_c + 30)$                            | kPa  | (Webb, 1970)              |
|                                                    | $E_s = \alpha q_c$                               | kPa  | (Sanglerat 1972)          |
|                                                    | $\alpha = 2 \text{ for } q_c < 4788 \text{ kPa}$ |      |                           |
| $\alpha = 1.5 \text{ for } q_c > 4788 \text{ kPa}$ |                                                  |      |                           |

## Supplementary Figures

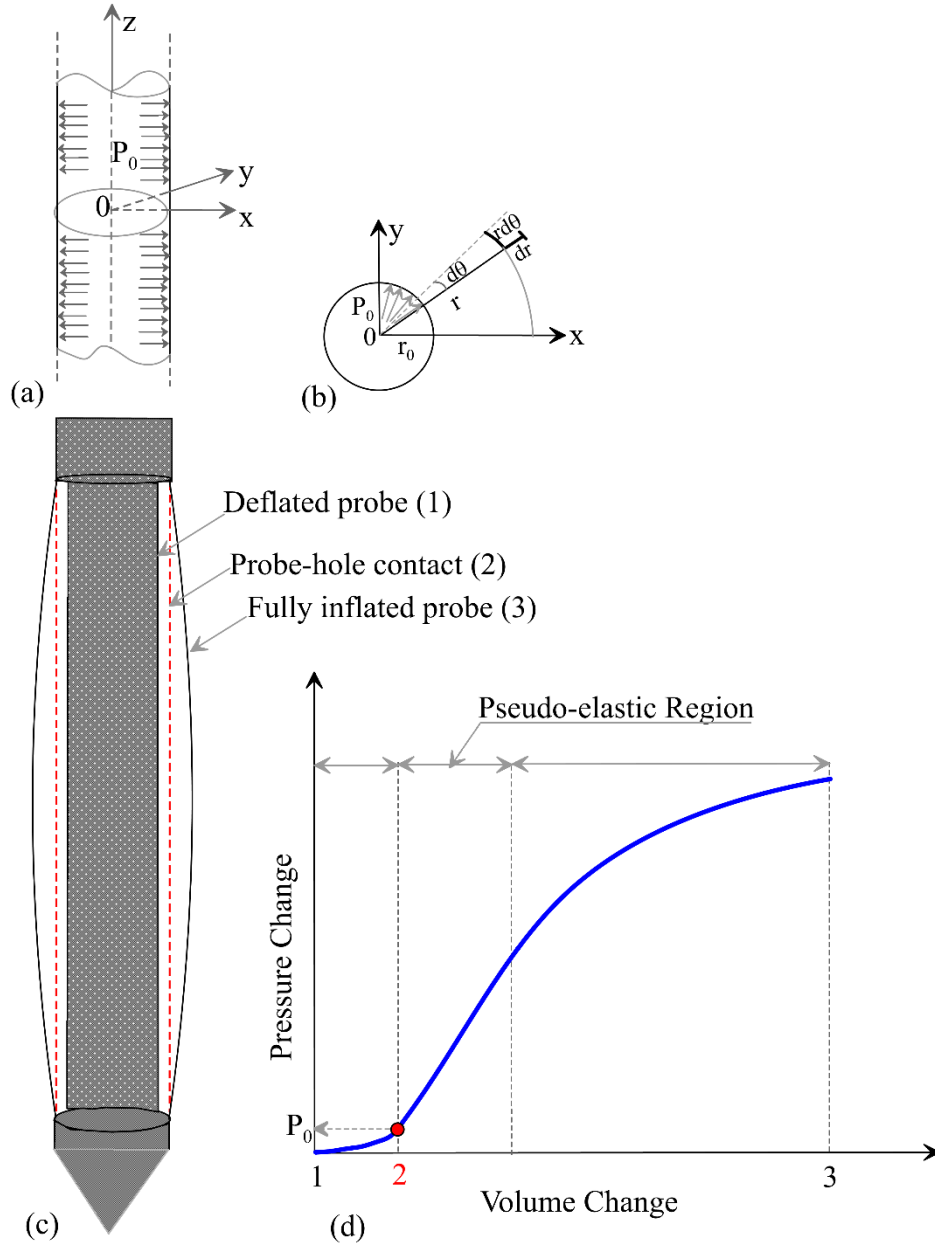

**Fig. S1. Schematic of the PENCEL pushed-in pressuremeter (PPMT): (a) applied cavity pressure, (b) radial and circumferential (hoop) expansion around the probe, (c) probe inflation sequence from deflated to fully expanded states, and (d) idealized pressure–volume curve highlighting the pseudo-elastic region for modulus derivation (adapted from Briaud 1992, modified for PPMT).**

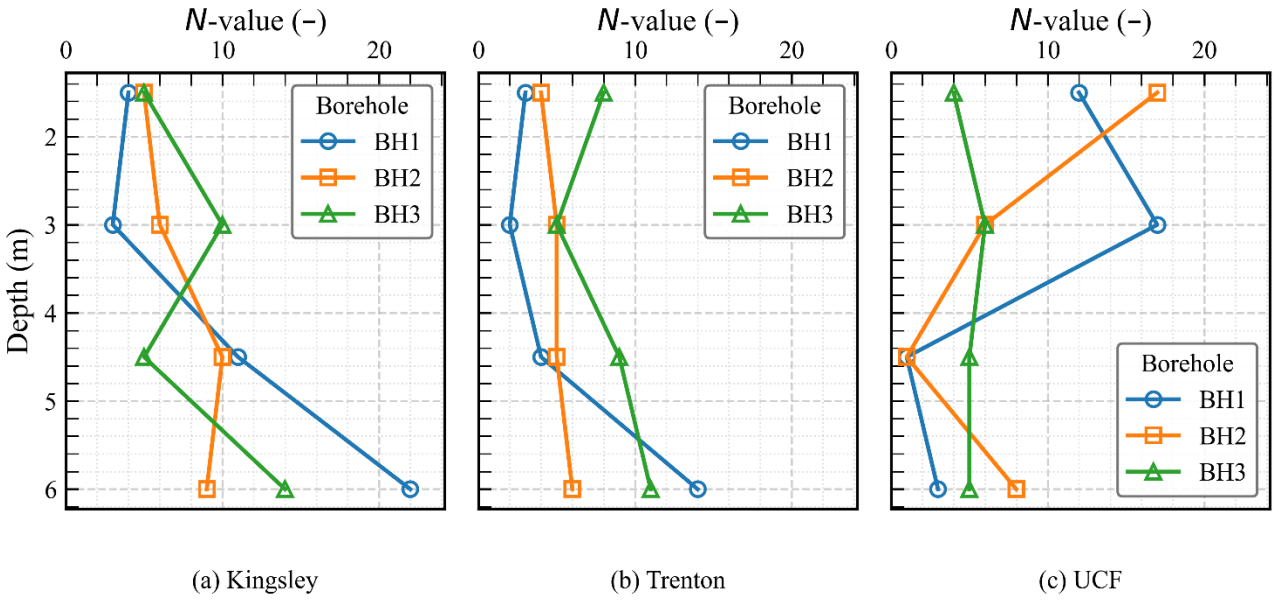

Fig. S2. Variation of SPT  $N$ -values with depth for (a) Kingsley, (b) Trenton, and (c) UCF.

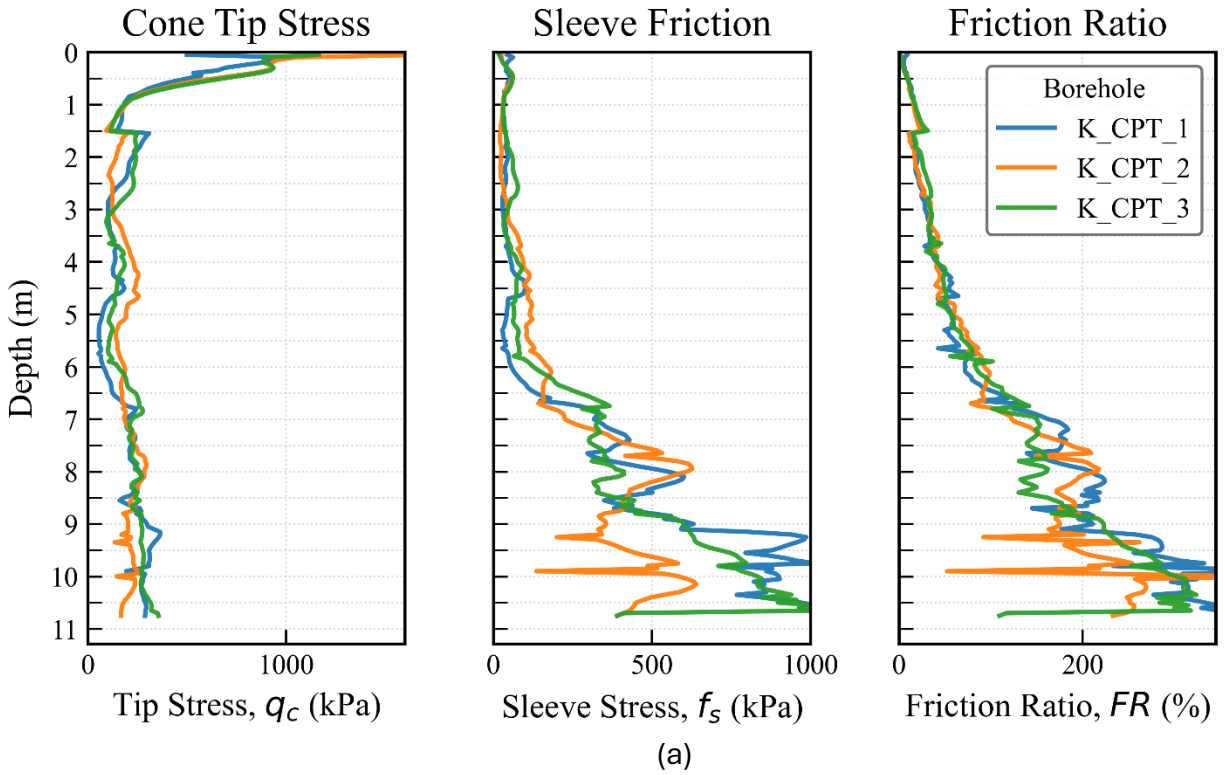

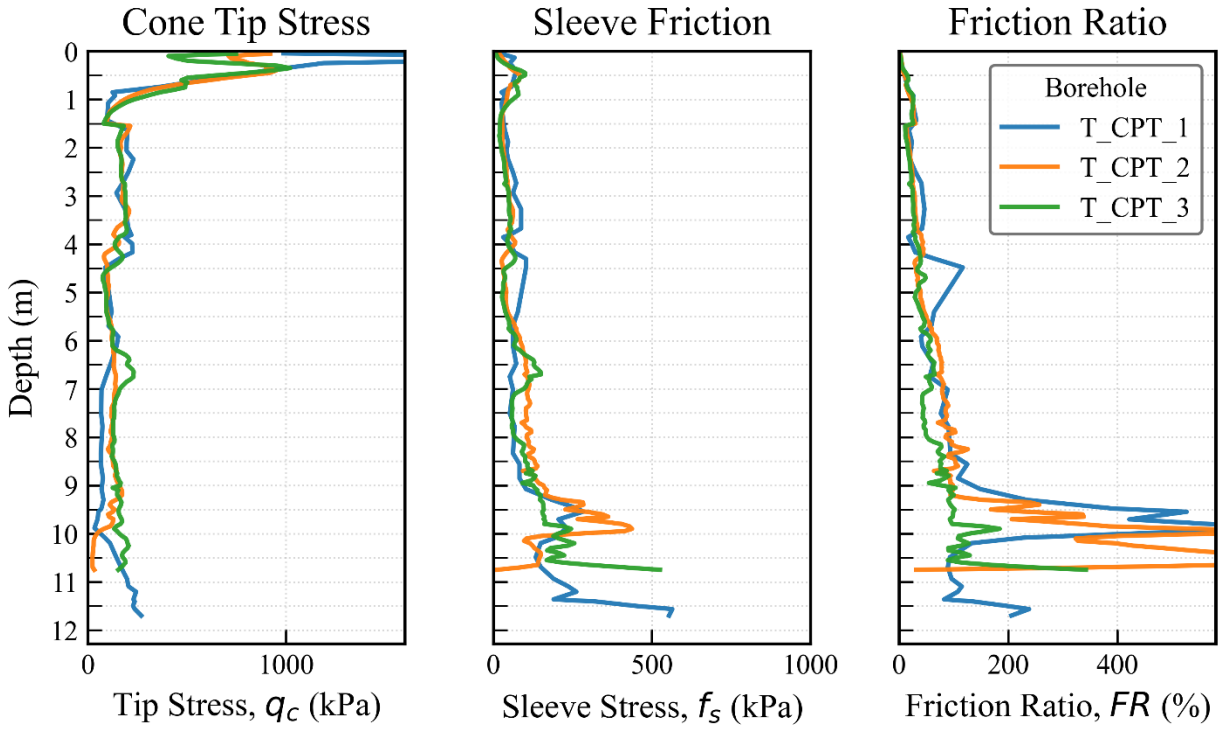

(b)

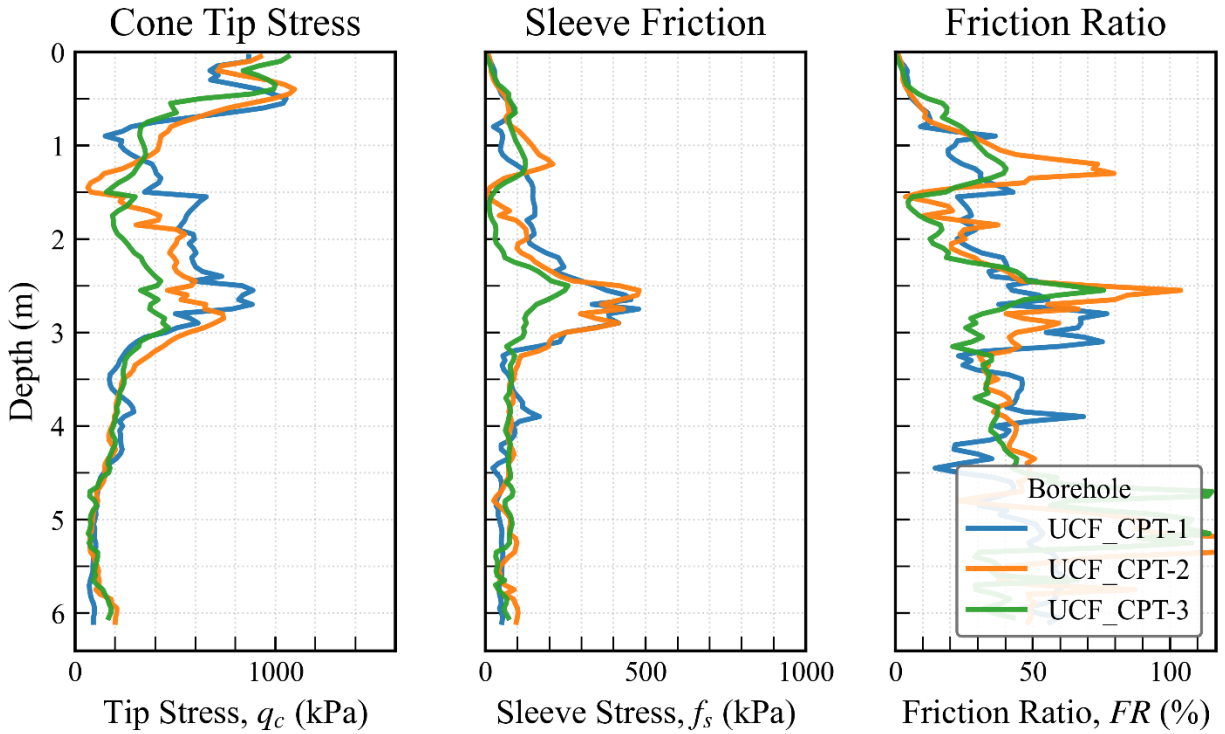

(c)

**Fig. S3. CPT results for the (a) Kingsley, (b) Trenton, and (c) UCF sites showing  $q_c$ ,  $f_s$ , and  $F_R$  versus depth.**

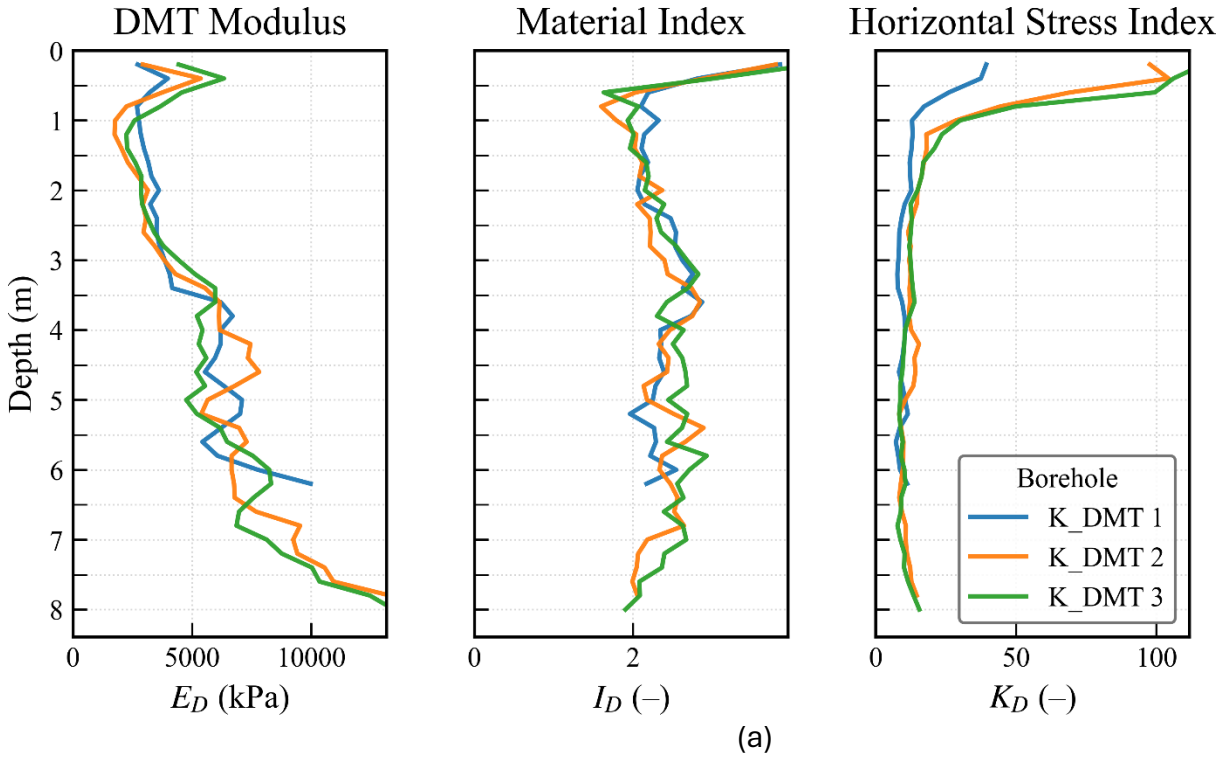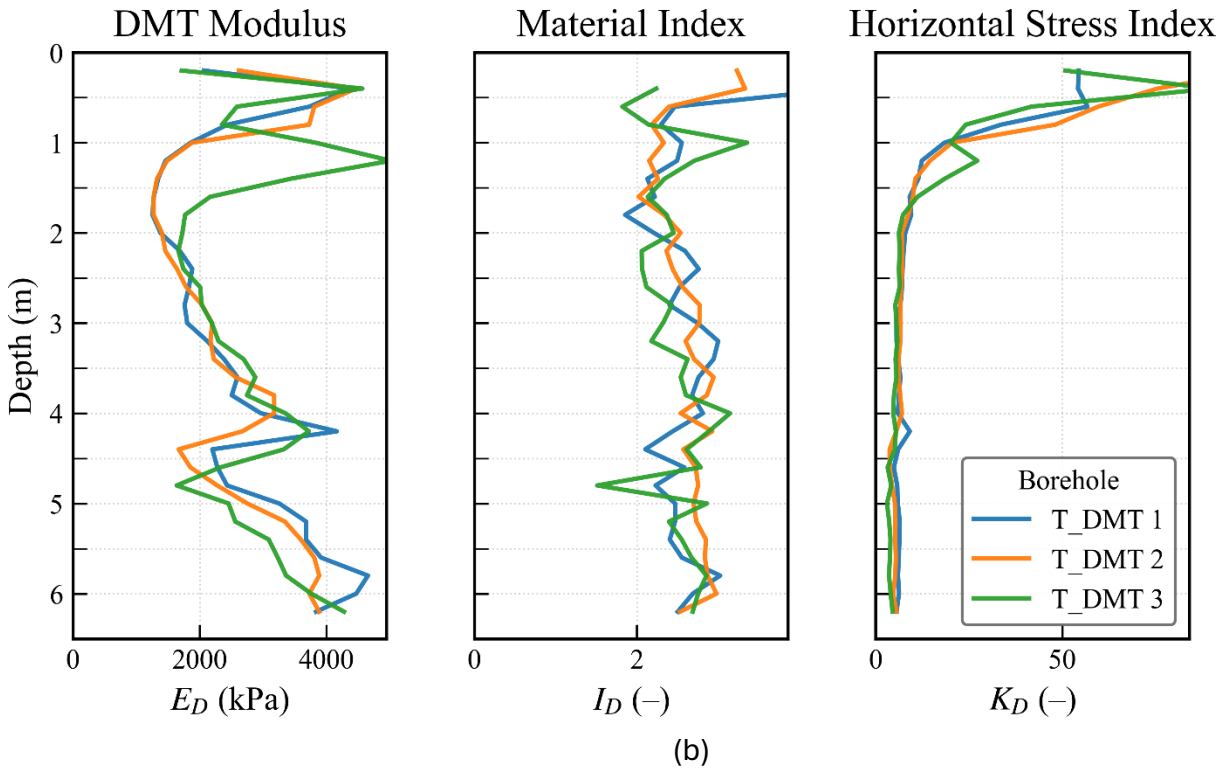

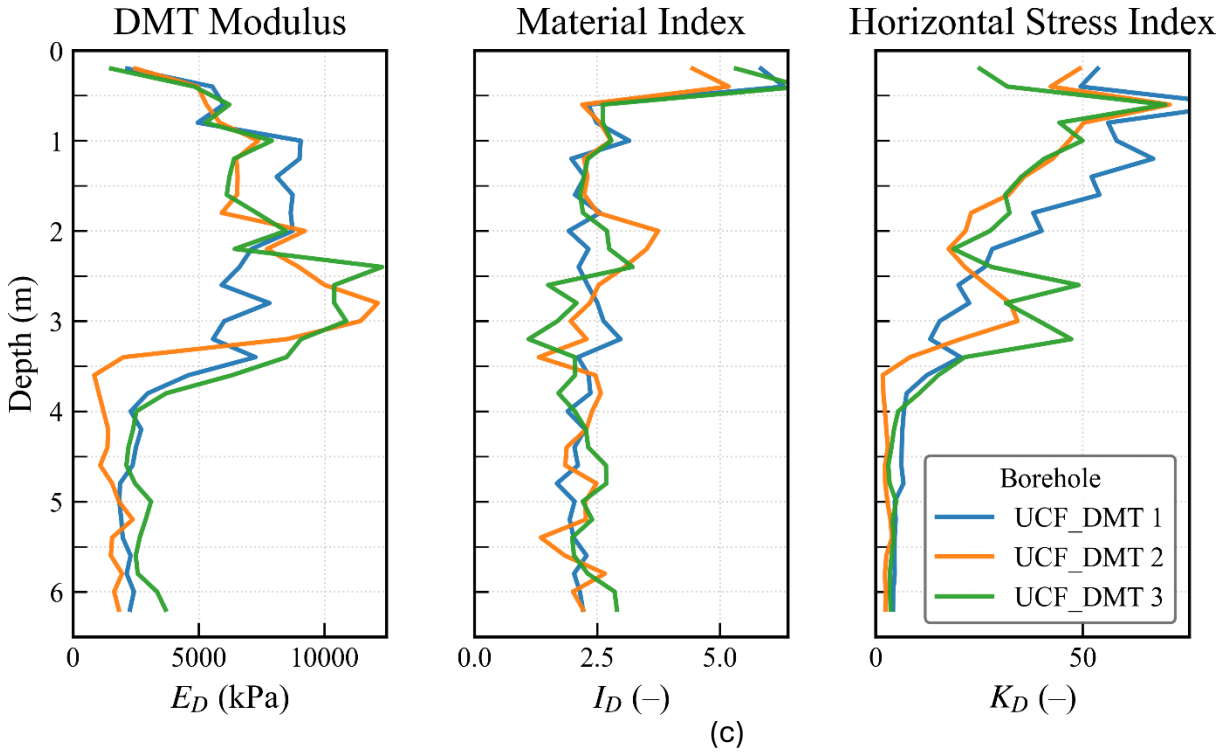

Fig. S4. DMT results show variation of  $E_{DMT}$ ,  $I_D$ , and  $K_D$  with depth for (a) Kingsley, (b) Trenton, and (c) UCF sites.

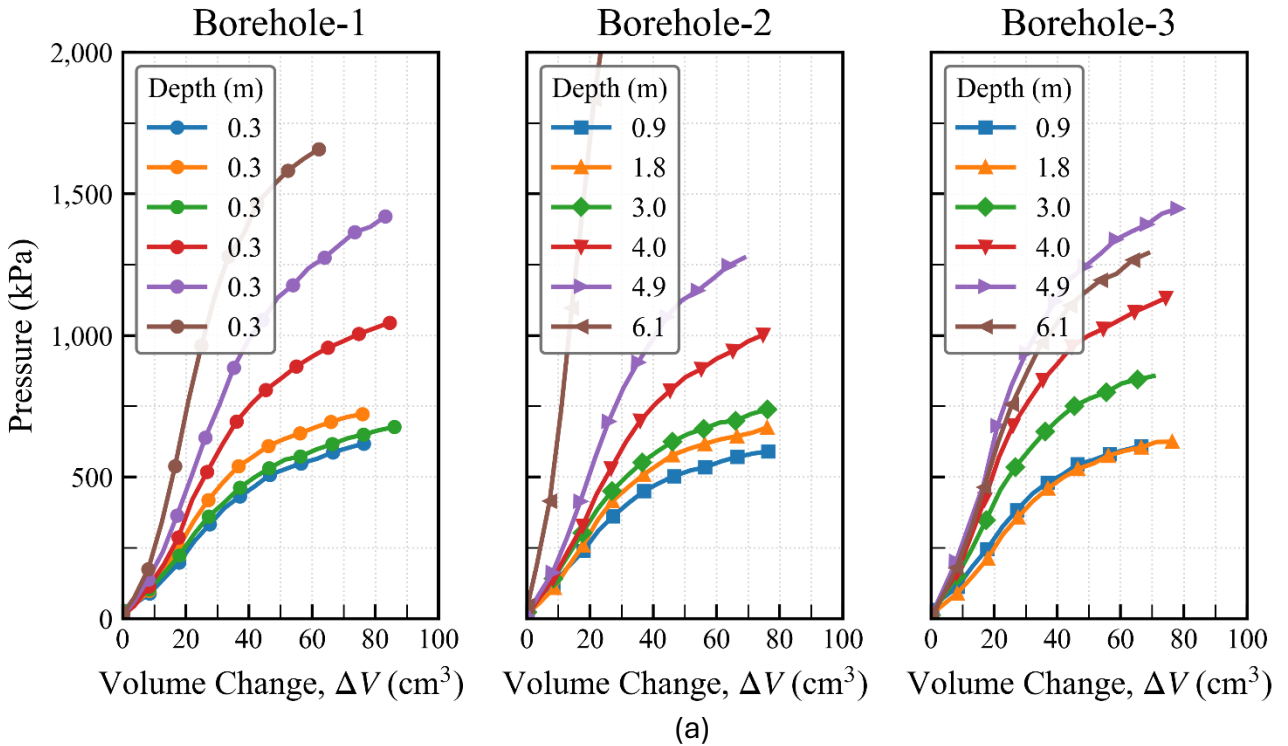

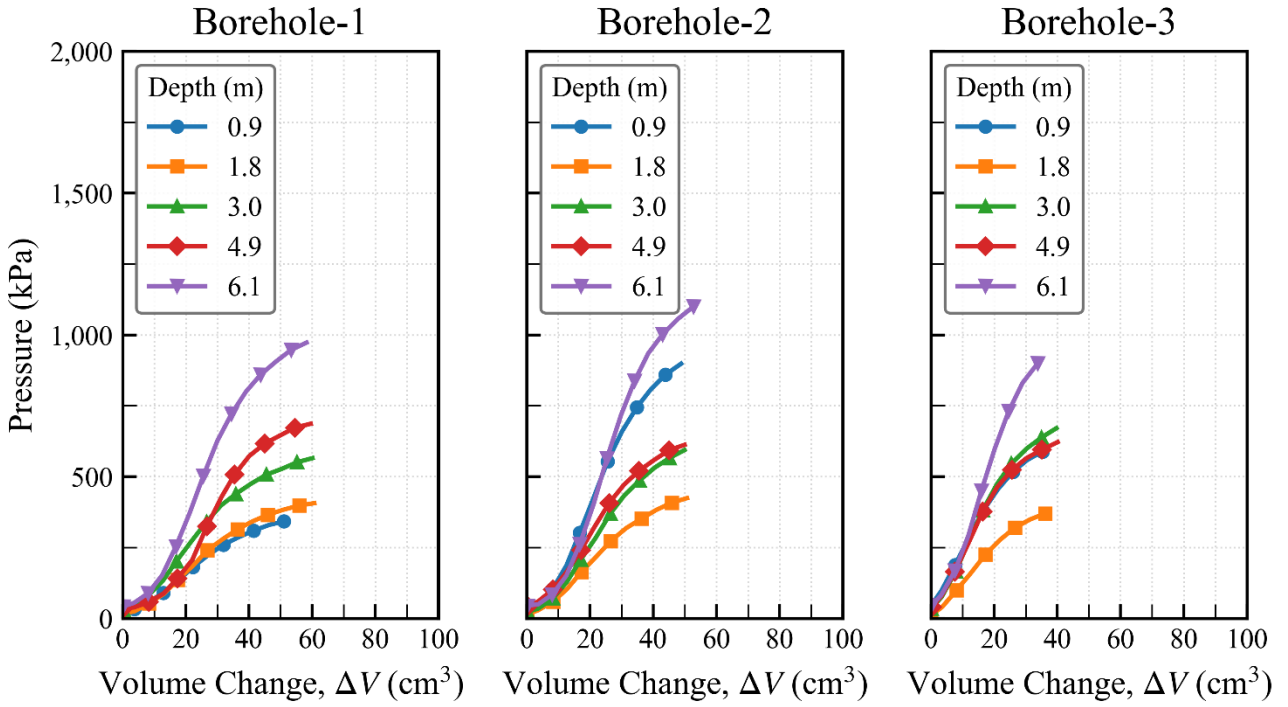

(b)

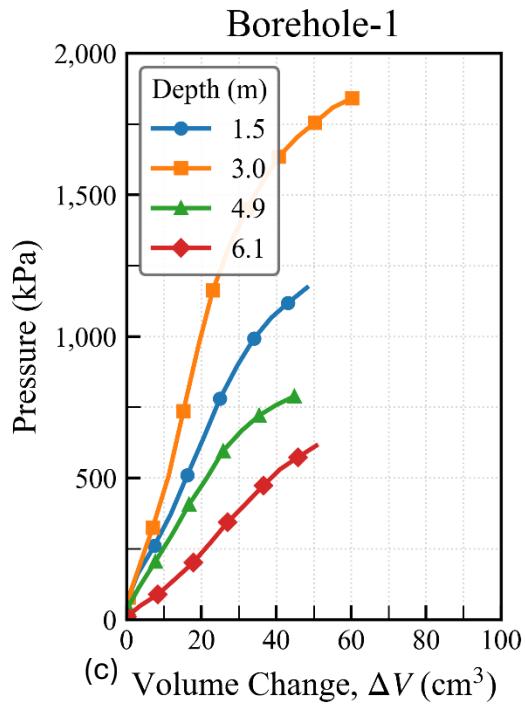

(c)

**Fig. S5. Pushed-in PPMT pressure versus volume change expansion curves for multiple test depths at (a) Kingsley, (b) Trenton, and (c) UCF sites.**

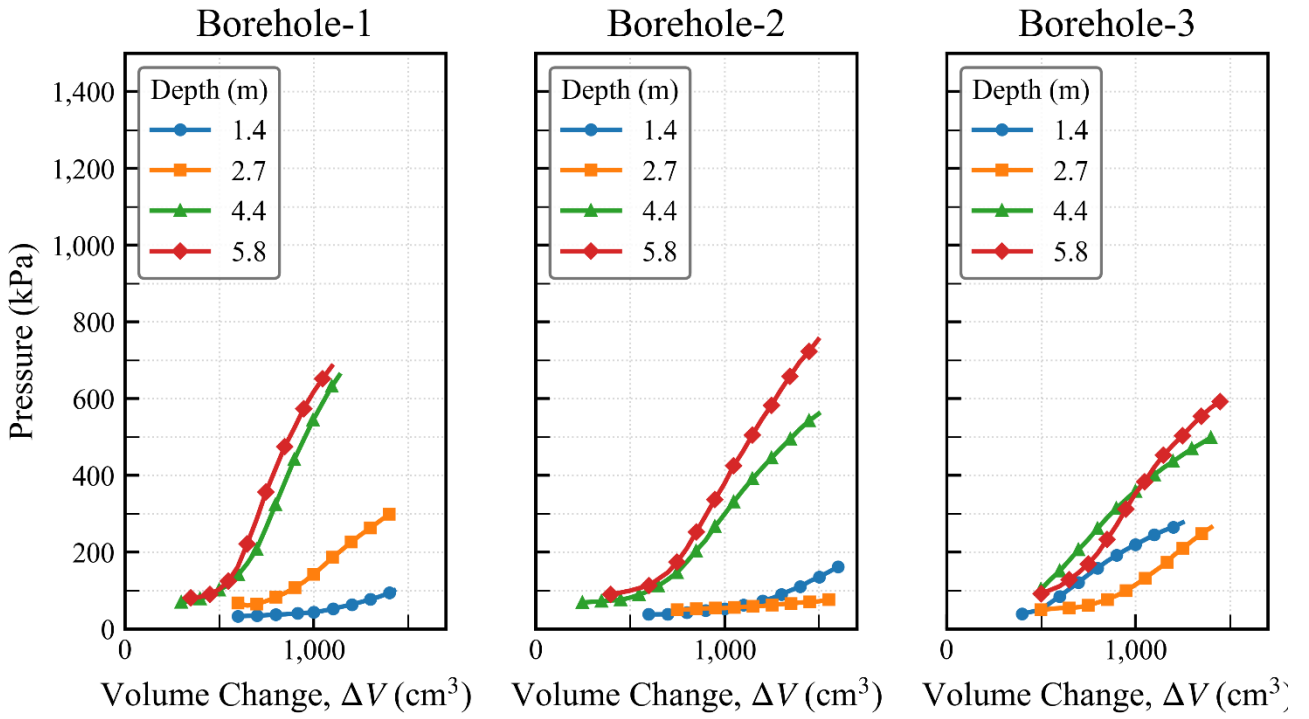

(a)

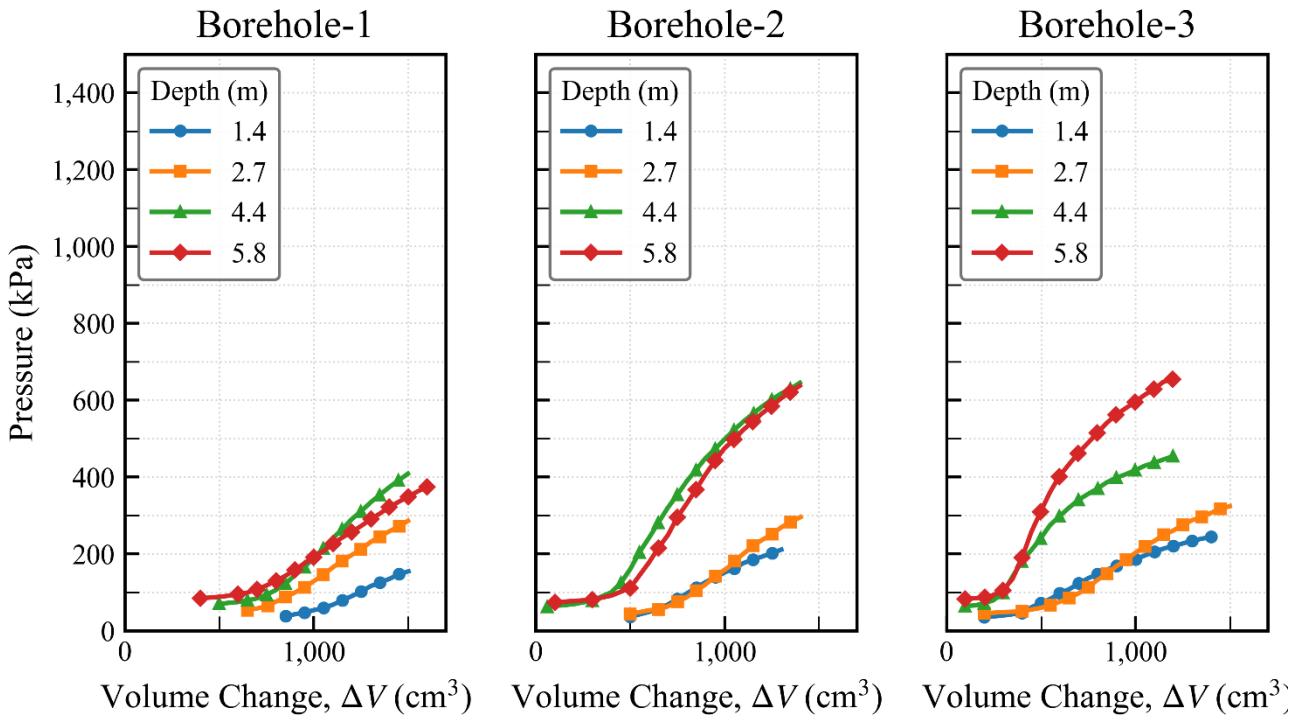

(b)

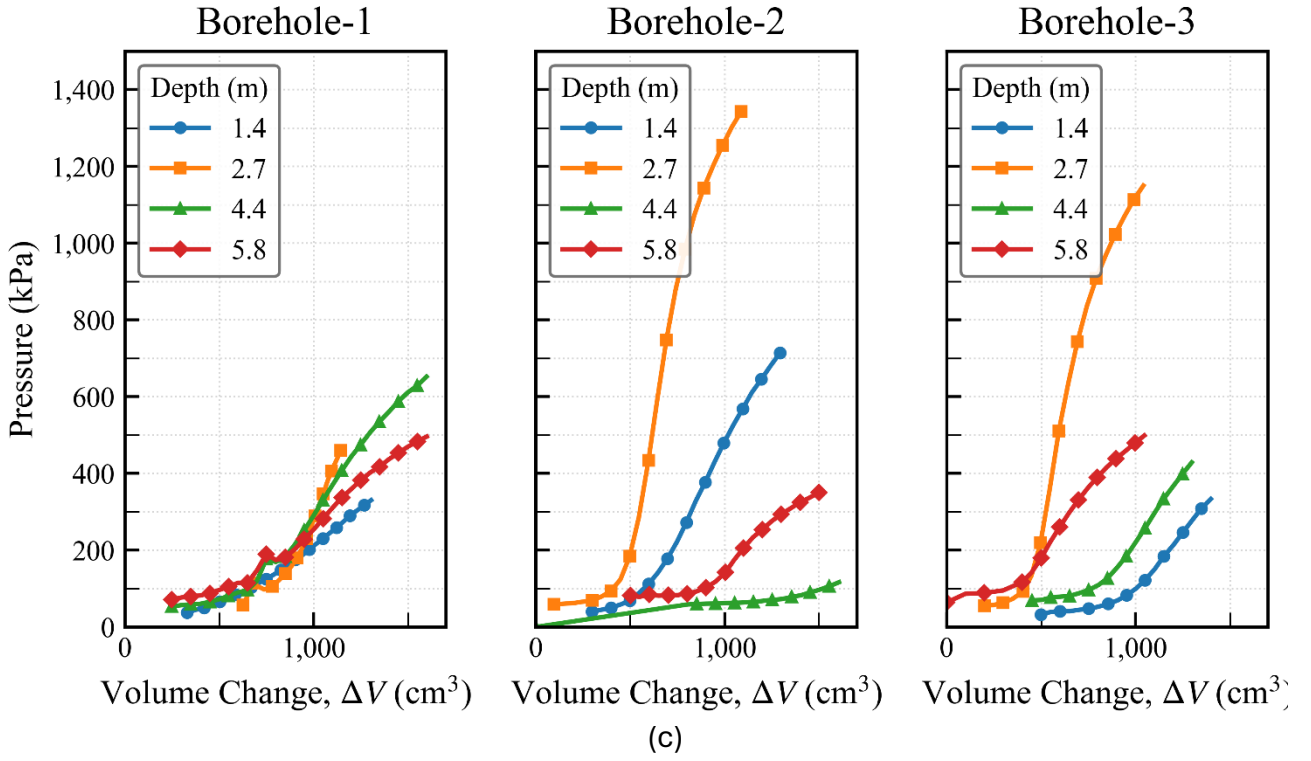

**Fig. S6. TEXAM PMT pressure versus volume change expansion curves for multiple test depths at (a) Kingsley, (b) Trenton, and (c) UCF sites.**

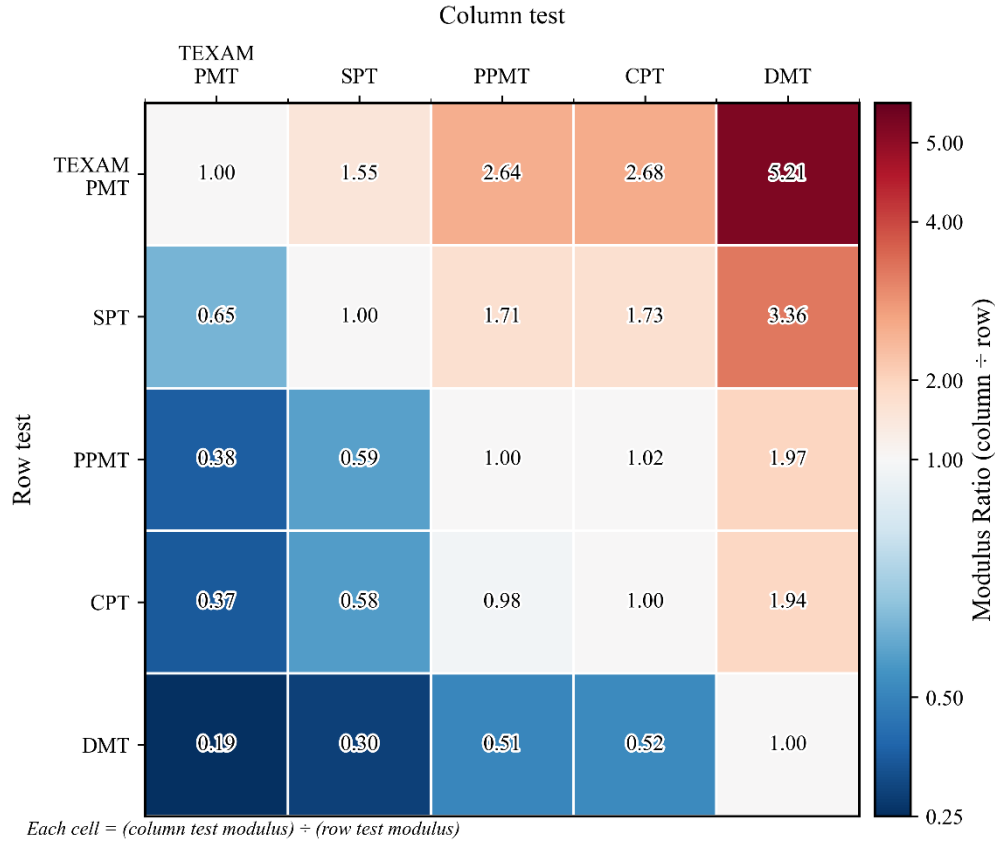

**Fig.S7. Color coded map of average modulus ratios ( $E_{row}/E_{column}$ ) across in-situ test types between 2–6.5 m depths; values near 1.0 indicate agreement in modulus magnitude.**

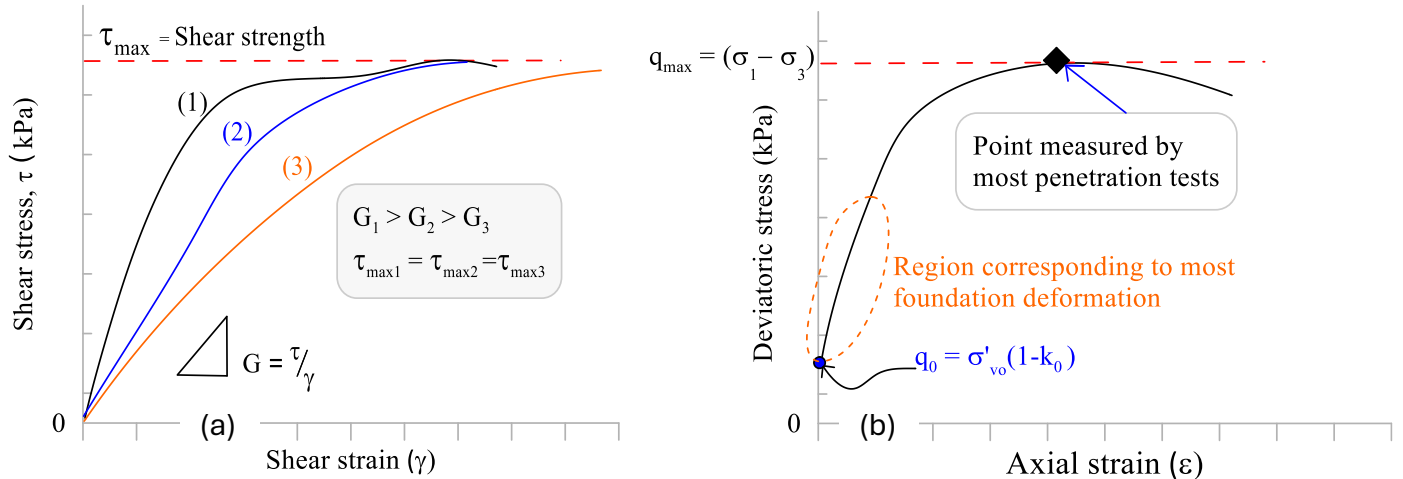

**Fig. S8. (a) Stress-strain behavior for materials with identical strength but different modulus; (b) Modulus comparison by test type (adapted from Mayne (2001) and Sabatini et al. (2002)).**

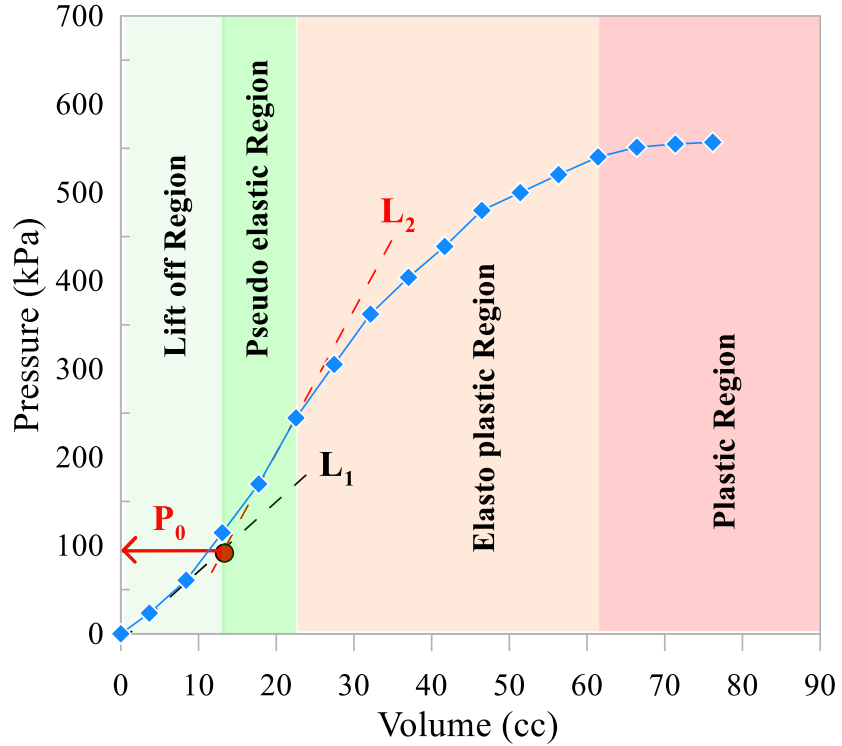

**Fig. S9. Pressure–volume curve from PPMT showing contact pressure ( $P_0$ ), pseudo-elastic region, and yielding. Tangents  $L_1$  and  $L_2$  identify the start of elastic response for modulus ( $E_0$ ) derivation.**

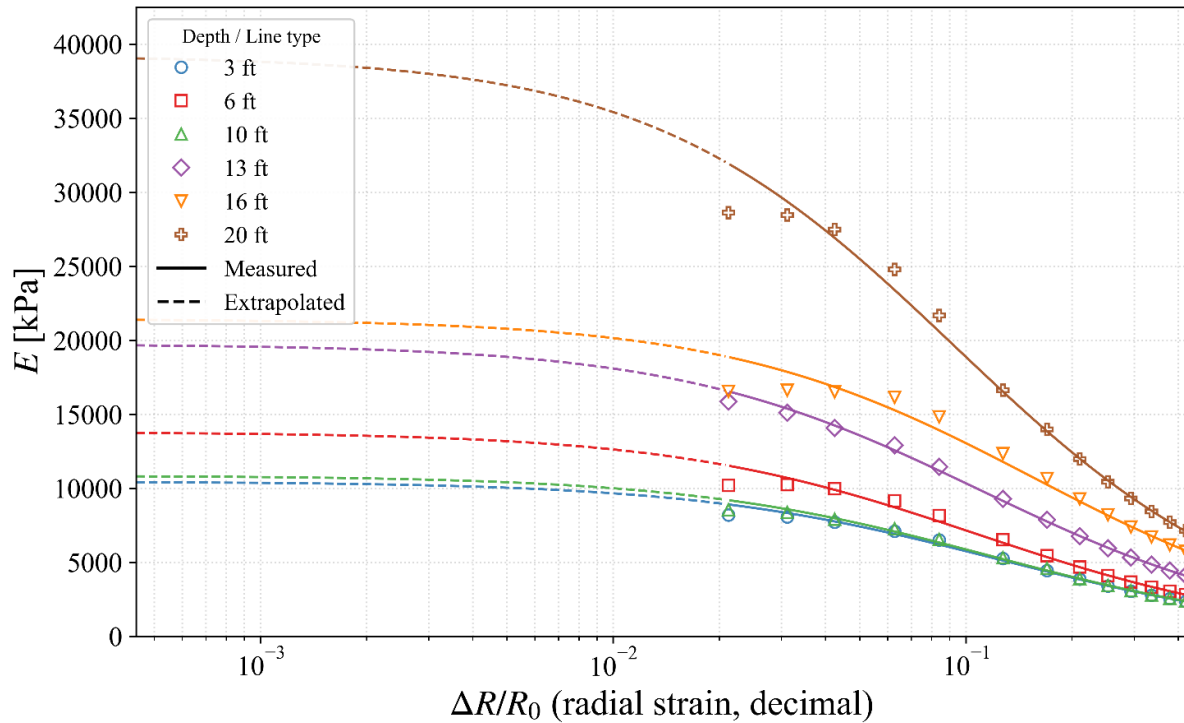

**Fig. S10. Measured and extrapolated strain-dependent modulus degradation from PPMT tests across depths, showing a reduction in  $E$  with increasing radial strain.**
